# Supplementary material
Source: PubMed Central journal article supplement (PMC2095755)
Supplement: heart_93_12_1637__1.pdf [file heart_93_12_1637__1.pdf]

## Cardiovascular magnetic resonance and computed tomography in congenital heart disease

Andrew Crean

### Web only references

1. Petersen S, Peto V, Rayner M Congenital heart disease statistics. (2003) British Heart Foundation: London.
2. Hoffmann A, Engelfriet P, Mulder V. Radiation exposure during follow-up of adults with congenital heart disease. *International Journal of Cardiology* (2006) doi:10.1016/j.ijcard.2006.07.012.
3. Odegard KC, DiNardo JA, Tsai-Goodman B, Powell AJ, Geva T, Laussen PC. Anaesthesia considerations for cardiac MRI in infants and small children. *Paediatr Anaesth*. 2004;14:471-6.
4. Simonetti OP, Cook S. Technical aspects of pediatric CMR. *J Cardiovasc Magn Reson*. 2006;8:581-93
5. Varaprasathan GA, Araoz PA, Higgins CB, Reddy GP. Quantification of flow dynamics in congenital heart disease: applications of velocity-encoded cine MR imaging. *Radiographics*. 2002;22:895-905 **Useful review of the principles of cine phase contrast imaging and its specific applications in congenital heart disease**
6. Gewillig M, Cullen S, Mertens B, Lesaffre E, Deanfield J. Risk factors for arrhythmia and death after Mustard operation for simple transposition of the great arteries. *Circulation* 1991; 84:187–192.
7. Alfakih K, Plein S, Bloomer T, Jones T, Ridgway J, Sivananthan M. Comparison of right ventricular volume measurements between axial and short axis orientation using steady-state free precession magnetic resonance imaging. *J Magn Reson Imaging*. 2003;18:25-32
8. Strugnell WE, Slaughter RE, Riley RA, Trotter AJ, Bartlett H. Modified RV short axis series--a new method for cardiac MRI measurement of right ventricular volumes. *J Cardiovasc Magn Reson*. 2005;7:769-74.
9. Yamamuro M, Tadamura E, Kubo S, Toyoda H, Nishina T, Ohba M, Hosokawa R, Kimura T, Tamaki N, Komeda M, Kita T, Konishi J. Cardiac functional analysis with multi-detector row CT and segmental reconstruction algorithm: comparison with echocardiography, SPECT, and MR imaging. *Radiology*. 2005;234:381-90.
10. Choe YH, Ko JK, Lee HJ, Kang IS, Park PW, Lee YT. MR imaging of non-visualized pulmonary arteries at angiography in patients with congenital heart disease. *J Korean Med Sci*. 1998;13:597-602.
11. Kondo C, Takada K, Yokoyama U, Nakajima Y, Momma K, Sakai F. Comparison of three-dimensional contrast-enhanced magnetic resonance angiography and axial radiographic angiography for diagnosing congenital stenoses in small pulmonary arteries. *Am J Cardiol*. 2001 Feb 15;87(4):420-4.
12. Silverman JM, Julien PJ, Herfkens RJ, Pelc NJ. Quantitative differential pulmonary perfusion: MR imaging versus radionuclide lung scanning. *Radiology*. 1993;189:699-701.
13. Fratz S, Hess J, Schwaiger M, Martinoff S, Stern HC. More accurate quantification of pulmonary blood flow by magnetic resonance imaging than by

lung perfusion scintigraphy in patients with fontan circulation. *Circulation*. 2002;106:1510-3.

14. Hager A, Kaemmerer H, Leppert A, Prokop M, Blucher S, Stern H, Hess J. Follow-up of adults with coarctation of the aorta: comparison of helical CT and MRI, and impact on assessing diameter changes. *Chest*. 2004;126:1169-76.
15. Chen SJ, Lin MT, Lee WJ, Liu KL, Wang JK, Chang CI, Li YW, Chiu IS. Coronary artery anatomy in children with congenital heart disease by computed tomography. *Int J Cardiol*. 2006 Dec 13; [Epub ahead of print]
16. Roeleveld RJ, Marcus JT, Boonstra A, Postmus PE, Marques KM, Bronzwaer JG, Vonk-Noordegraaf A. A comparison of noninvasive MRI-based methods of estimating pulmonary artery pressure in pulmonary hypertension. *J Magn Reson Imaging*. 2005;22(1):67-72. **Comparison of 5 previously proposed MRI-based indices with invasive pulmonary artery pressure measurements made at right heart catheterization. The authors demonstrated that none of the previously published methods appeared to be sufficiently accurate for clinical use.**
